# Supplementary material for: Stabilization of Eu2+ in Li2B4O7 with the BO3 network through U6+ co-doping and defect engineering
Source: Royal Society of Chemistry journal article supplement (doi:10.1039/d2cp04672e), 2022-12-05
Supplement: d2cp04672e1.pdf [file d2cp04672e1.pdf]

## Stabilization $\text{Eu}^{2+}$ in $\text{Li}_2\text{B}_4\text{O}_7$ with $\text{BO}_3$ Network through $\text{U}^{6+}$ Co-doping and Defect Engineering

Annu Balhara<sup>1,2</sup>, Santosh K. Gupta<sup>1,2\*</sup>, G.D. Patra<sup>1,3</sup>, Brindaban Modak<sup>1,4</sup>, J. Prakash<sup>1,5</sup>, K. Sudarshan<sup>1,2</sup>, M. Mohapatra<sup>1,2</sup>

<sup>1</sup>Homi Bhabha National Institute, Anushaktinagar, Mumbai – 400094, India

<sup>2</sup>Radiochemistry Division, Bhabha Atomic Research Centre, Trombay, Mumbai-400085, India

<sup>3</sup>Technical Physics Division, Bhabha Atomic Research Centre, Trombay, Mumbai-400085, India

<sup>4</sup>Chemistry Division, Bhabha Atomic Research Centre, Trombay, Mumbai-400085, India

<sup>5</sup>Materials Group, Bhabha Atomic Research Centre, Trombay, Mumbai-400085, India

\*To whom correspondence should be addressed. Electronic mail:  
\*santoshg@barc.gov.in/ santufrnd@gmail.com (SKG)

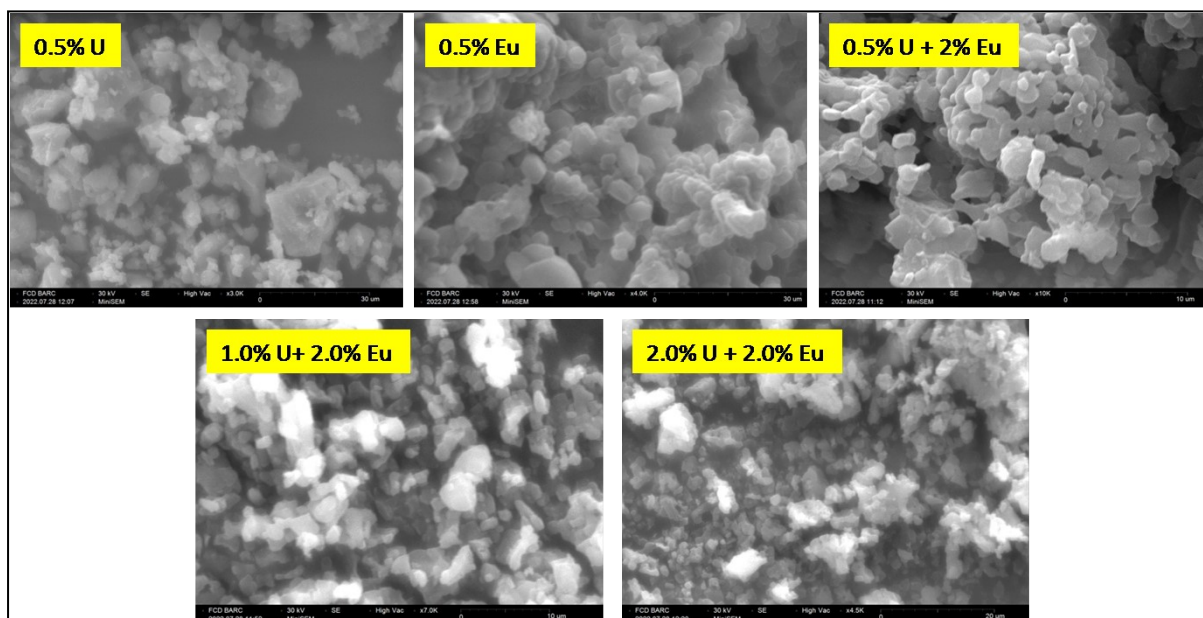

**Figure S1:** SEM images of doped (0.5%  $\text{Eu}^{3+}$  and 0.5%  $\text{U}^{6+}$ ) and co-doped (2.0%  $\text{Eu}^{3+}$  and 0.5 to 2.0%  $\text{U}^{6+}$ ) samples of LTB.

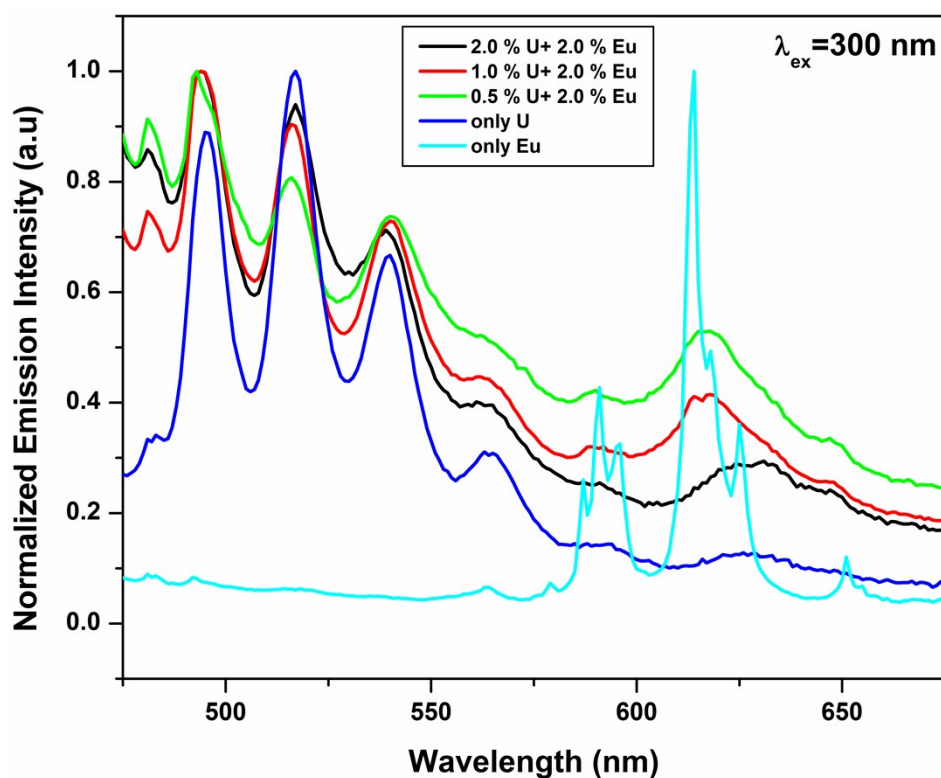

**Figure S2:** Photoluminescence emission spectra of doped (0.5%  $Eu^{3+}$  and 0.5%  $U^{6+}$ ) and co-doped (2.0%  $Eu^{3+}$  and 0.5 to 2.0%  $U^{6+}$ ) LTB samples.

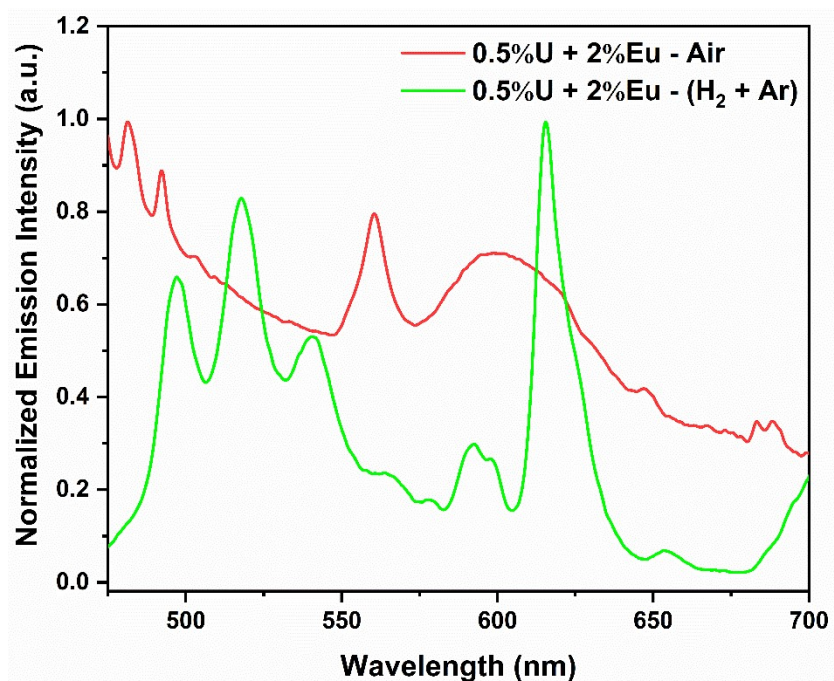

**Figure S3:** Photoluminescence emission spectra of 2%  $Eu^{3+}$  and 0.5%  $U^{6+}$  co-doped LTB samples annealed in air and a reducing atmosphere (92% Ar + 8%  $H_2$ ).

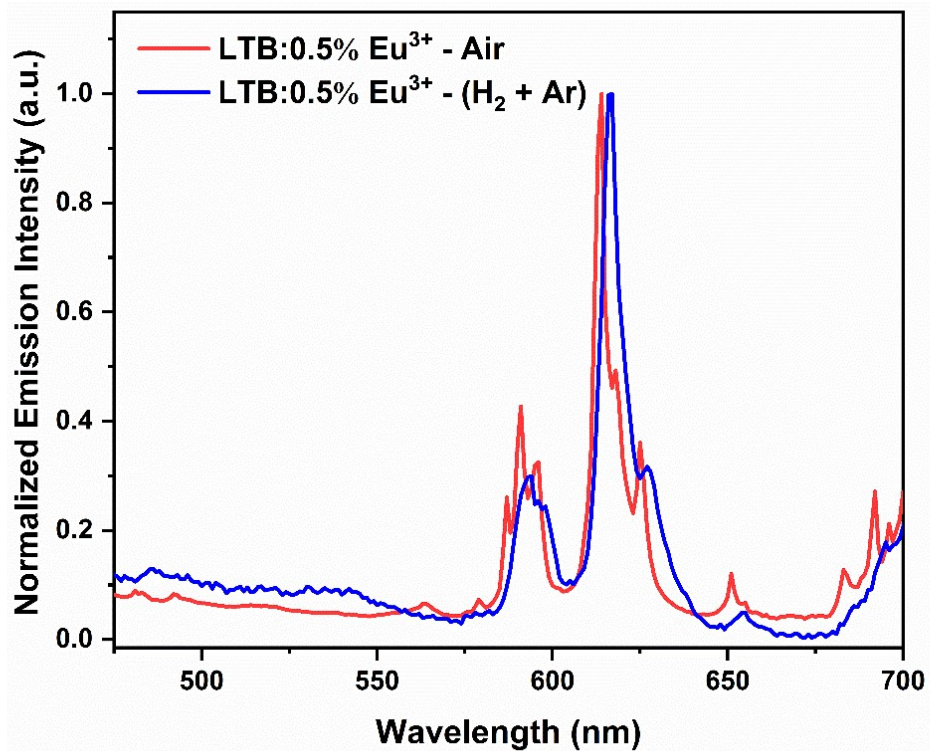

**Figure S4:** Photoluminescence emission spectra of LTB:0.5% Eu<sup>3+</sup> annealed in air and a reducing atmosphere (92% Ar + 8% H<sub>2</sub>).

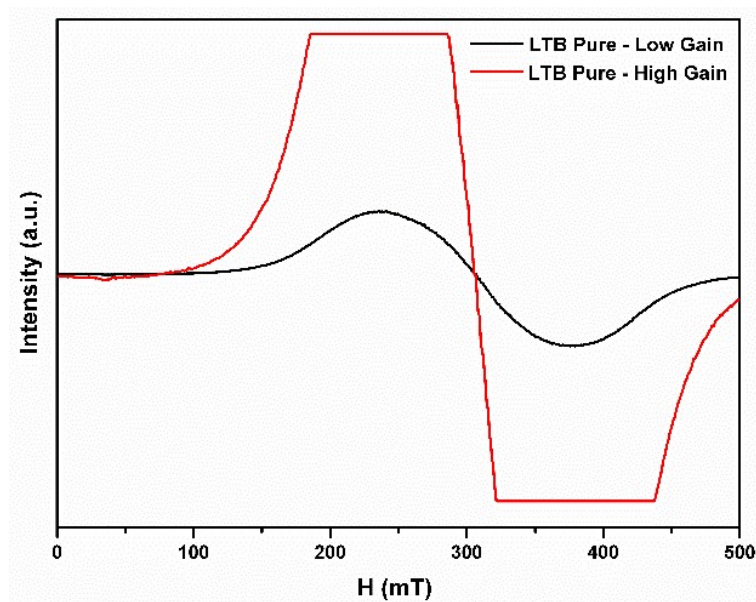

**Figure S5:** ESR spectra of LTB pure sample at 100 K recorded at low gain and high gain.

The resonance signal in the pure LTB sample gets saturated at a higher gain of  $4 \times 10^4$ . Therefore, the ESR spectra for pure LTB was obtained at a lower gain value of  $2 \times 10^3$ .

**Table S1: Recent Borate based luminescent materials having divalent europium ion (2020-22)**

| System                                                                                                                                                                            | Flux                                          | Temperature                                                               | Remarks                                                | Ref. |
|-----------------------------------------------------------------------------------------------------------------------------------------------------------------------------------|-----------------------------------------------|---------------------------------------------------------------------------|--------------------------------------------------------|------|
| Eu <sup>2+</sup> single-doped K <sub>2</sub> SrCa(PO <sub>4</sub> ) <sub>2x</sub> (BO <sub>3</sub> ) <sub>x</sub> white phosphors                                                 | 97%N <sub>2</sub> /3%H <sub>2</sub>           | 1400 °C for 4 h                                                           | Very high temperature is needed                        | [1]  |
| LiSrB <sub>9</sub> O <sub>15</sub> :Eu <sup>3+</sup> /Eu <sup>2+</sup>                                                                                                            | Self-reduction                                | 800°C                                                                     | Self reduction is triggered by BO <sub>4</sub> network | [2]  |
| SrAl <sub>2</sub> O <sub>4</sub> :Eu <sup>2+</sup> ,Dy <sup>3+</sup> borate glass                                                                                                 | under carbon reduction atmosphere             | 1500 °C for 1 h                                                           | Very high temperature is needed                        | [3]  |
| Eu <sup>2+</sup> : NaBa <sub>4</sub> (BO <sub>3</sub> ) <sub>3</sub> co-doped with different cations Dy <sup>3+</sup> , Ho <sup>3+</sup> and Nd <sup>3+</sup>                     | 95%N <sub>2</sub> +5%H <sub>2</sub>           | 900 °C for 8 h                                                            | -                                                      | [4]  |
| Eu <sup>2+</sup> -doped Ba <sub>3</sub> Lu(BO <sub>3</sub> ) <sub>3</sub> p phosphor                                                                                              | 10% H <sub>2</sub> + 90% N <sub>2</sub>       | 1250 °C for 6 h                                                           | Very high temperature as well as higher hydrogen flux  | [5]  |
| Eu <sup>2+</sup> , Dy <sup>3+</sup> : NaSr <sub>4</sub> (BO <sub>3</sub> ) <sub>3</sub>                                                                                           | under a reductive atmosphere                  | 880 °C for 8 h                                                            | -                                                      | [6]  |
| KSr <sub>4</sub> B <sub>3</sub> O <sub>9</sub> : Eu <sup>2+</sup>                                                                                                                 | N <sub>2</sub> /H <sub>2</sub>                | 900 °C for 10 h                                                           | High temperature is needed                             | [7]  |
| LiSr <sub>4</sub> (BO <sub>3</sub> ) <sub>3</sub> :Eu <sup>2+</sup> , Dy <sup>3+</sup>                                                                                            | 5% H <sub>2</sub> and 95% N <sub>2</sub>      | 950 °C for 8 h                                                            | High temperature is needed                             | [8]  |
| NaBaB <sub>9</sub> O <sub>15</sub> :Eu <sup>2+</sup>                                                                                                                              | under the reducing atmosphere                 | 725 °C for 30 h                                                           | High thermal duration of more than a day is required   | [9]  |
| Sr <sub>3-x</sub> -yB <sub>2</sub> O <sub>6</sub> :xEu <sup>2+</sup> ,yRE <sup>3+</sup> (RE = Nd, Gd, Dy)                                                                         | 5%H <sub>2</sub> -95%N <sub>2</sub>           | 1280–1310 °C for 5–20 h                                                   | High temperature and time is needed                    | [10] |
| Sr <sub>6</sub> (BO <sub>3</sub> ) <sub>3</sub> BN <sub>2</sub> :Eu <sup>2+</sup>                                                                                                 | Covered corundum crucible                     | 1300 °C, for 12 h                                                         | High temperature is needed                             | [11] |
| Eu <sup>2+</sup> /Eu <sup>3+</sup> doped strontium borates: SrB <sub>4</sub> O <sub>7</sub> , SrB <sub>2</sub> O <sub>4</sub> and Sr <sub>3</sub> (BO <sub>3</sub> ) <sub>2</sub> | Covering the crucibles with a lid             | Pre-calcined at 700 °C for 5 h and further heat-treated at 850 °C for 5 h | -                                                      | [12] |
| Ba <sub>3</sub> ScB <sub>3</sub> O <sub>9</sub> :Eu <sup>2+</sup> phosphor                                                                                                        | H <sub>2</sub> (20%) and N <sub>2</sub> (80%) | 1150 °C for 6 h                                                           | Very high hydrogen flux                                | [13] |
| Ca[B <sub>8</sub> O <sub>11</sub> (OH) <sub>4</sub> ]: Eu                                                                                                                         |                                               | 350 °C for 12 h                                                           | Hydroxyl ion may affect the PL                         | [14] |
| Sr[B <sub>8</sub> O <sub>11</sub> (OH) <sub>4</sub> ]:Eu <sup>2+</sup>                                                                                                            | No reducing atm. used                         | 350 °C for 12 h                                                           | Self reduction                                         | [15] |
| Eu <sup>2+</sup> in SrB <sub>4</sub> O <sub>7</sub>                                                                                                                               | Covered                                       | 850 °C for                                                                | -                                                      | [16] |

|                                                                                                          |                                       |                 |                                                                             |                      |
|----------------------------------------------------------------------------------------------------------|---------------------------------------|-----------------|-----------------------------------------------------------------------------|----------------------|
|                                                                                                          | crucibles                             | another 5 h     |                                                                             |                      |
| Ce <sup>3+</sup> -Eu <sup>2+</sup> in<br>LiSr <sub>4</sub> (BO <sub>3</sub> ) <sub>3</sub> phospho<br>rs | 5% H <sub>2</sub> /95% N <sub>2</sub> | 1000 °C for 3 h | High temperature is<br>needed                                               | [17]                 |
| LTB:Eu <sup>2+</sup>                                                                                     | 8% H <sub>2</sub> +92%<br>Ar          | 750 oC          | Low flux<br>Lower temperature<br>U <sup>6+</sup> assisted Co-<br>doping ass | <b>This<br/>work</b> |

**Table S2:**The calculated g values for pure LTB, doped (0.5% Eu<sup>3+</sup> and 0.5% U<sup>6+</sup>) and co-doped (2.0% Eu<sup>3+</sup> and 0.5 to 2.0% U<sup>6+</sup>) LTB samples at both room temperature (rt) and 100 K.

|                             | Frequency (GHz) | H <sub>1</sub> (mT) | g <sub>1</sub> | H <sub>2</sub> (mT) | g <sub>2</sub> |
|-----------------------------|-----------------|---------------------|----------------|---------------------|----------------|
| <b>LTB pure - RT</b>        | 9.437           | 304.42              | 2.2158         | -                   | -              |
| <b>LTB-0.5%Eu- RT</b>       | 9.437           | 326.67              | 2.0649         | -                   | -              |
| <b>LTB-0.5%U- RT</b>        | 9.437           | 304.43              | 2.2157         | -                   | -              |
| <b>LTB-0.5%U-2%Eu- RT</b>   | 9.437           | 344.83              | 1.9561         | 156.36              | 4.3140         |
| <b>LTB-1%U-2%Eu- RT</b>     | 9.437           | 334.15              | 2.0187         | 156.4               | 4.3129         |
| <b>LTB-2%U-2%Eu- RT</b>     | 9.437           | 342.57              | 1.9690         | 160.62              | 4.1996         |
| <b>LTB pure - 100 K</b>     | 9.435           | 306.94              | 2.1972         | -                   | -              |
| <b>LTB-0.5%Eu- 100 K</b>    | 9.435           | 311.64              | 2.1640         | -                   | -              |
| <b>LTB-0.5%U- 100 K</b>     | 9.435           | 308.89              | 2.1833         | -                   | -              |
| <b>LTB-0.5%U-2%Eu-100 K</b> | 9.435           | 303.82              | 2.2197         | 148.48              | 4.5420         |
| <b>LTB-1%U-2%Eu-100 K</b>   | 9.435           | 306.18              | 2.2026         | 148.58              | 4.5389         |
| <b>LTB-2%U-2%Eu-100 K</b>   | 9.435           | 308.46              | 2.1863         | 156.47              | 4.3101         |

The 'g' value of free-electron is ~2.0023, but the shift in the 'g' value occurs depending on the environment and the spin-orbit coupling. The 'g' value or the resonance position is specific for a given radical present in a particular environment. The energy required for the spin transition is related to the applied magnetic field (B), g-factor, and the constant  $\beta_e$ , called the Bohr Magneton:

$$h\nu = g\beta_e B \dots (1)$$

Where ' $\nu$ ' is the frequency of microwave radiation and ' $h$ ' is the Planck's constant. The ' $g$ ' values are calculated using the above equation 1.

The ESR spectra were recorded in X-band of the microwave region with a frequency of  $\sim 9.43$  GHz for both at room temperature and 100 K. The attenuation was kept as 15 dB.

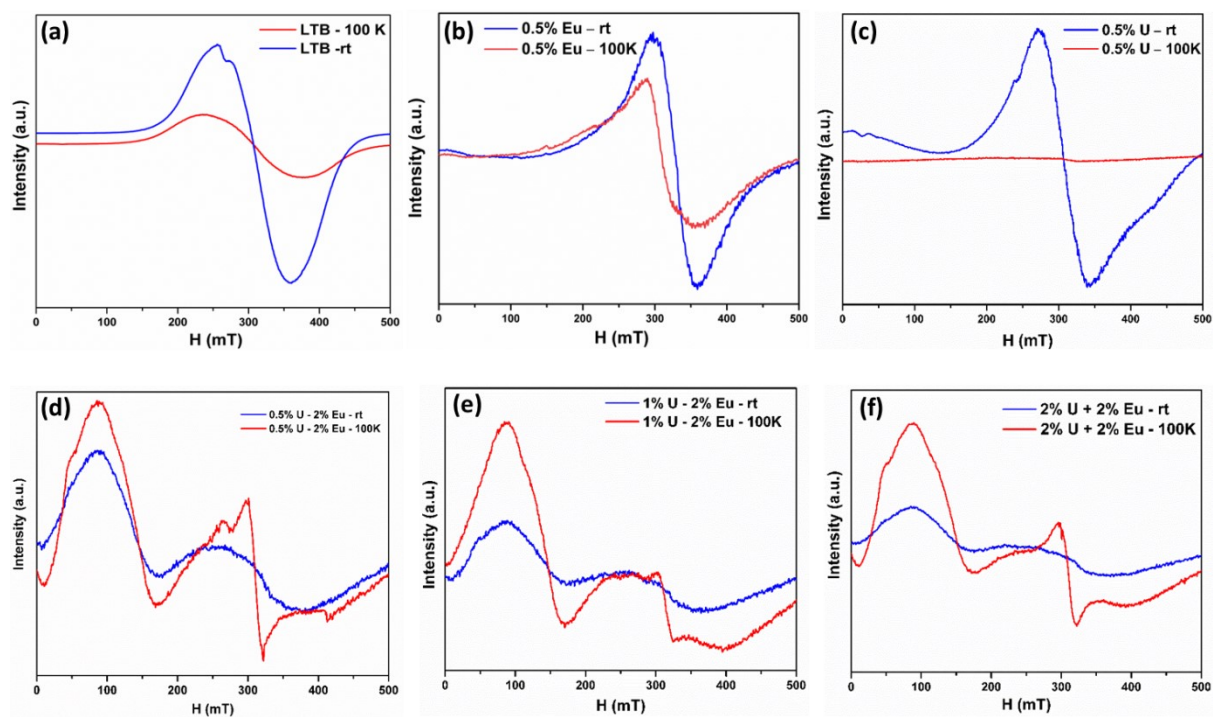

**Figure S6:** ESR spectra of (a) LTB (b) 0.5%  $\text{Eu}^{3+}$  doped LTB (c) 0.5%  $\text{U}^{6+}$  doped LTB (d) 2%  $\text{Eu}^{3+}$  and 0.5%  $\text{U}^{6+}$  doped LTB (e) 2%  $\text{Eu}^{3+}$  and 1%  $\text{U}^{6+}$  doped LTB and (f) 2%  $\text{Eu}^{3+}$  and 2%  $\text{U}^{6+}$  doped LTB, at room temperature and 100 K.

- [1] J. Zhao, X. Wu, Y. Zhang, K. Li, J. Yu, H. Wang, B. Li, Design of  $K_2SrCa(PO_4)_{2-x}(BO_3)_x:Eu^{2+}$  phosphors with full-visible spectrum by crystal structure modification, *Journal of Luminescence* 251 (2022) 119273.
- [2] P. Fan, Z. He, Y. Chen, X. He, C. Huang, Q. Miao, Q. Zhang, X. Liu, L. Li, Co-existence and unique co-emission properties of  $Eu^{3+}/Eu^{2+}$  and  $Sm^{3+}/Sm^{2+}$  in  $LiSrB_9O_{15}$  host lattice, *Journal of Luminescence* 251 (2022) 119169.
- [3] S. Gültekin, S. Yıldırım, O. Yılmaz, İ.Ç. Keskin, M.İ. Katı, E. Çelik, Structural and optical properties of  $SrAl_2O_4: Eu^{2+}/Dy^{3+}$  phosphors synthesized by flame spray pyrolysis technique, *Journal of Luminescence* 206 (2019) 59-69.
- [4] R. Li, H. Li, C. Chang, Z. Sun, Enhanced afterglow behavior of a new  $Eu^{2+}: NaBa_4(BO_3)_3$  yellow phosphor co-doped with different cations  $Dy^{3+}$ ,  $Ho^{3+}$  and  $Nd^{3+}$ , *Ceramics international* 48 (2022) 8914-8920.
- [5] Z. Tang, F. Du, H. Liu, Z. Leng, X. Sun, H. Xie, M. Que, Y. Wang,  $Eu^{2+}$ -Doped Layered Double Borate Phosphor with Ultrawide Near-Infrared Spectral Distribution in Response to Ultraviolet–Blue Light Excitation, *Advanced Optical Materials* 10 (2022) 2102204.
- [6] R. Li, H. Li, C. Chang, Photoluminescence and afterglow behavior of a new orange long-lasting borate phosphor  $Eu^{2+}, Dy^{3+}: NaSr_4(BO_3)_3$ , *Journal of Luminescence* 243 (2022) 118659.
- [7] Q. Lv, X. Ma, Y. Dong, Y. Li, B. Shao, C. Wang, S. Yang, C. Wang, Ratiometric optical thermometer with high-sensitive temperature sensing based on tunable luminescence of  $Ce^{3+}-Eu^{2+}$  in  $KSr_4B_3O_9$  phosphors, *Advanced Powder Technology* 33 (2022) 103769.
- [8] R. Li, H. Cao, H. Li, D. Zhang, C. Chang, Polychromatic luminescence of  $LiSr_4(BO_3)_3:Eu^{2+}, Dy^{3+}$  persistent phosphors, *Ceramics international* 48 (2022) 20546-20554.
- [9] Y. Zhuo, S. Hariyani, J. Zhong, J. Brgoch, Creating a Green-Emitting Phosphor through Selective Rare-Earth Site Preference in  $NaBaB_9O_{15}:Eu^{2+}$ , *Chemistry of Materials* 33 (2021) 3304-3311.
- [10] K.-W. Chae, T.-R. Park, C. Cheon, II, J.S. Kim, Persistent luminescence of  $RE^{3+}$  co-doped  $Sr_3B_2O_6:Eu^{2+}$  yellow phosphors ( $RE = Nd, Gd, Dy$ ), *Journal of Luminescence* 194 (2018) 649-655.
- [11] S.G. Jantz, R. Erdmann, S. Hariyani, J. Brgoch, H.A. Höpfe,  $Sr_6(BO_3)_3BN_2$ : An Oxido–Nitrido–Borate Phosphor Featuring  $BN_2$  Dumbbells, *Chemistry of Materials* 32 (2020) 8587-8594.
- [12] T. Zheng, M. Runowski, P. Woźny, S. Lis, Influence of matrix on the luminescence properties of  $Eu^{2+}/Eu^{3+}$  doped strontium borates:  $SrB_4O_7$ ,  $SrB_2O_4$  and  $Sr_3(BO_3)_2$ , exhibiting multicolor tunable emission, *Journal of Alloys and Compounds* 822 (2020) 153511.
- [13] S. Lai, T. Hu, M.S. Molokeev, Z. Xia, Photoluminescence tuning in  $Ba_3ScB_3O_9:Eu^{2+}$  phosphor by crystal-site engineering, *Physics Open* 8 (2021) 100077.
- [14] P. Liang, W.-L. Lian, Z.-H. Liu,  $Ca[B_8O_{11}(OH)_4]:Eu^{2+}$  – A Highly Efficient Deep Blue-Emitting Phosphor Prepared by Low-Temperature Self-reduction, *Chemistry – A European Journal* 27 (2021) 13819-13827.
- [15] P. Liang, W.-L. Lian, Z.-H. Liu, Highly efficient blue-emitting phosphor of  $Sr[B_8O_{11}(OH)_4]:Eu^{2+}$  prepared by a self-reduction method, *Chemical Communications* 57 (2021) 3371-3374.
- [16] T. Zheng, M. Runowski, P. Rodríguez-Hernández, A. Muñoz, F.J. Manjón, M. Sójka, M. Suta, E. Zych, S. Lis, V. Lavín, Pressure-driven configurational crossover between  $4f^7$  and  $4f_65d^1$  States – Giant enhancement of narrow  $Eu^{2+}$  UV-Emission lines in  $SrB_4O_7$  for luminescence manometry, *Acta Materialia* 231 (2022) 117886.
- [17] C. Li, B. Chen, D. Deng, M. Wu, H. Yu, H. Li, C. Shen, L. Wang, S. Xu, Ratiometric optical thermometer with high-sensitive temperature sensing based on synergetic luminescence of  $Ce^{3+}-Eu^{2+}$  in  $LiSr_4(BO_3)_3$  phosphors, *Journal of Alloys and Compounds* 838 (2020) 155675.
